# Supplementary material
Source: PubMed Central journal article supplement (PMC6007033)
Supplement: NIHMS969095-supplement.pdf [file NIHMS969095-supplement.pdf]

Figure S1

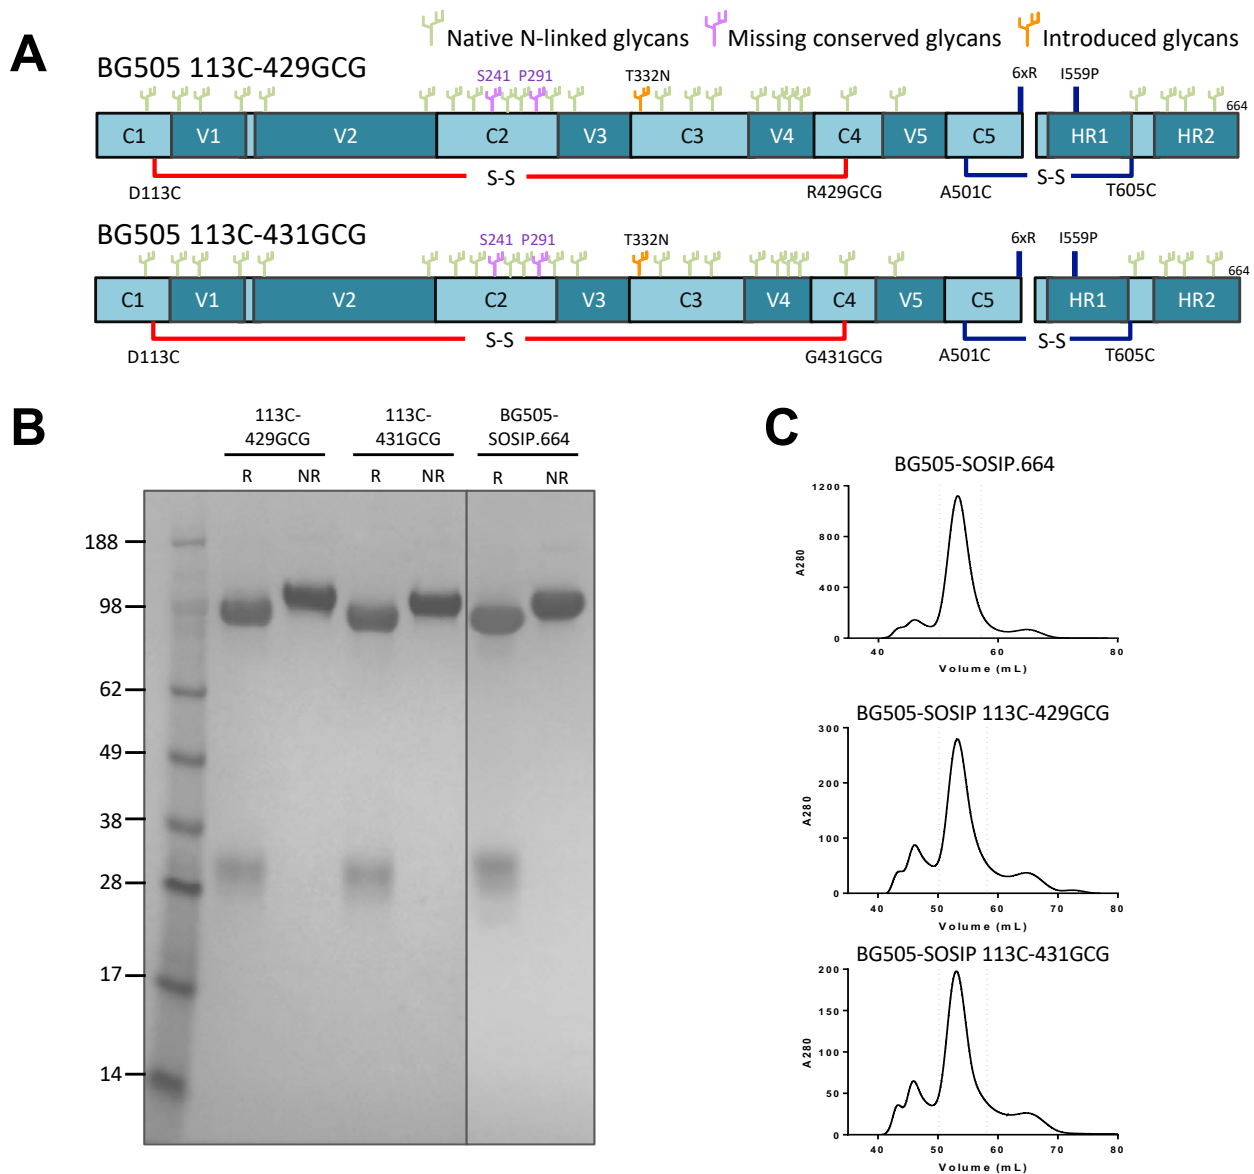

**Figure S1. Characteristics of interdomain-locked BG505-SOSIP.664 trimers, Related to Figure 1**  
 (A) Linear schematic of two locked BG505 SOSIP.664 trimers: 113C-429GCG and 113C-431GCG. The neo-disulfide bonds are indicated in red. Missing glycans that are conserved in more than 60% of HIV-1 isolates are indicated in purple. (B) SDS-PAGE analysis of unmutated and interdomain-locked BG505 SOSIP.664 trimers expressed in 293-FreeStyle cells using a 4-12% Bis-Tris Nu-PAGE gel under reducing and non-reducing conditions, followed by Coomassie blue staining. (C) SEC profile of unmutated and interdomain-locked BG505 SOSIP.664 trimers expressed in 293-FreeStyle cells.

Figure S2

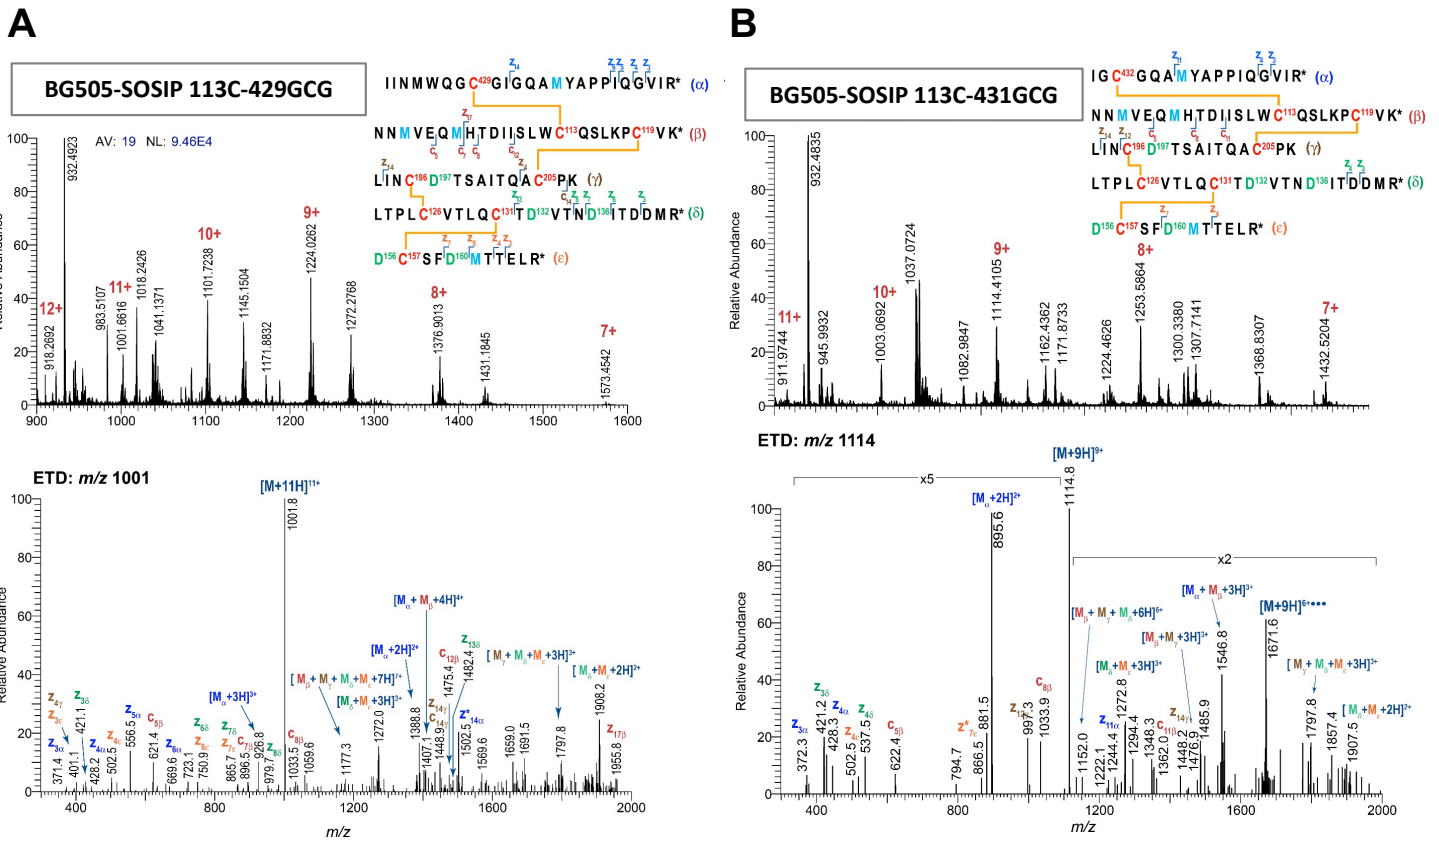

**Figure S2. LC-MS analysis of disulfide bonds in two interdomain-locked BG505 SOSIP.664 trimers, Related to Figure 1**

(A) Data for BG505-SOSIP 113C-429GCG. Top panel: Raw LC-MS data showing the elution of the relevant disulfide-linked peptide, abundantly ionizing in multiple charge states, as labeled on the spectrum. Bottom panel: ETD data for the ion in the 11+ charge state, m/z 1001. This spectrum clearly confirms the composition of the ion, as depicted on the top panel. C and Z ions are abundant in the spectrum, confirming the peptide sequence. Additionally, ions corresponding to cleavage across one or more disulfide bonds confirm the disulfide connectivity.

(B) Data for BG505-SOSIP 113C-431GCG. Top panel: Raw LC-MS data showing the elution of the relevant disulfide-linked peptide, abundantly ionizing in multiple charge states, as labeled on the spectrum. Bottom panel: ETD data for the ion in the 9+ charge state, m/z 1114. This spectrum clearly confirms the composition of the ion, as shown on the top panel. C and Z ions, along with ions resulting from disulfide cleavage, are labeled.

Figure S3

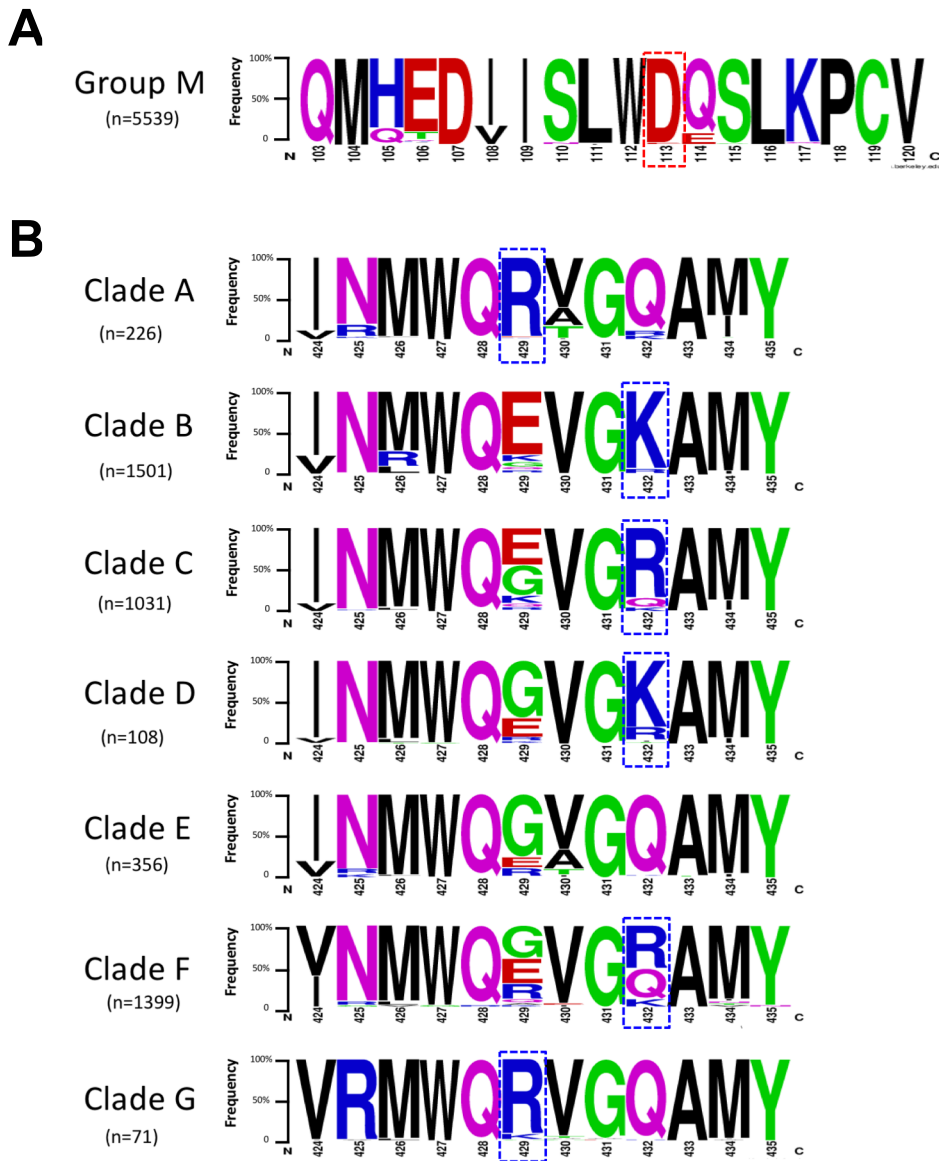

**Figure S3. Amino acid conservation within the inner-domain  $\alpha$ 1-helix region and the outer-domain  $\beta$ 20- $\beta$ 21 loop region of HIV-1 gp120, Related to Figure 1**

(A) Residue D113 in the  $\alpha$ 1-helix is nearly universally conserved across all group-M HIV-1 isolates. (B) A conserved positively-charged amino acid (K or R) within the  $\beta$ 20- $\beta$ 21 loop is frequently present at position 429 or 432 depending on the HIV-1 subtype. The height of each stack indicates the degree of conservation of each residue; the height of each letter represents the relative frequency of the indicated amino acid at that site.

Figure S4

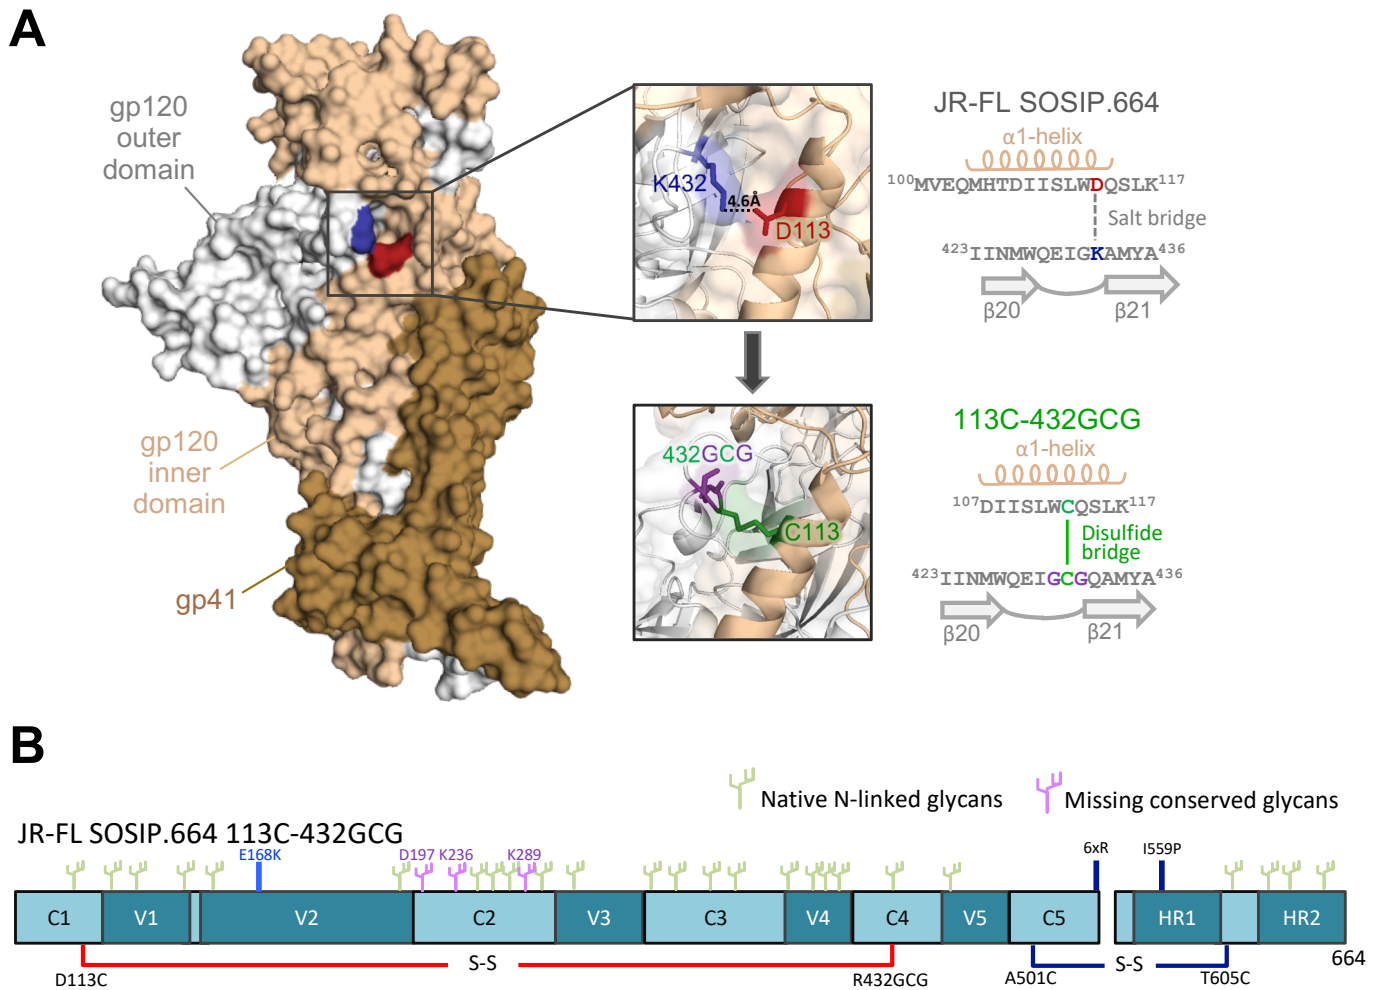

**Figure S4. Structure-based design of an interdomain-locked HIV-1 Env trimer derived from a clade-B isolate (JR-FL), Related to Figure 1**

(A) Intramolecular interaction between the gp120 inner-domain  $\alpha$ 1-helix and the outer-domain  $\beta$ 20- $\beta$ 21 loop in a clade-B soluble trimer (JR-FL SOSIP.664) and structure-based design of an interdomain-locked HIV-1 Env trimer. A single protomer from a crystal structure of the JR-FL SOSIP.664 trimer (PDB ID: 5FYK; Stewart-Jones et al., 2016) is illustrated in surface representation, highlighting the intramolecular contact between R432 in the outer-domain  $\beta$ 20-21 loop (blue) and D113 in the inner-domain  $\alpha$ 1-helix (red) of gp120. The upper inset shows a semi-transparent magnification of the interactive region with the side chains of K432 and D113 highlighted in stick representation, with the neighboring sequences reported in the scheme on the right. The design of an interdomain-locked mutant (D113C-R432GCG) bearing a neo-disulfide bridge (green) is illustrated in the lower inset, with the sequences reported in the scheme on the right. (B) Linear schematic of the interdomain-locked JR-FL mutant D113C-R432GCG. The neo-disulfide bond is indicated in red. Missing glycans that are conserved in more than 60% of HIV-1 isolates are indicated in purple.

Figure S5

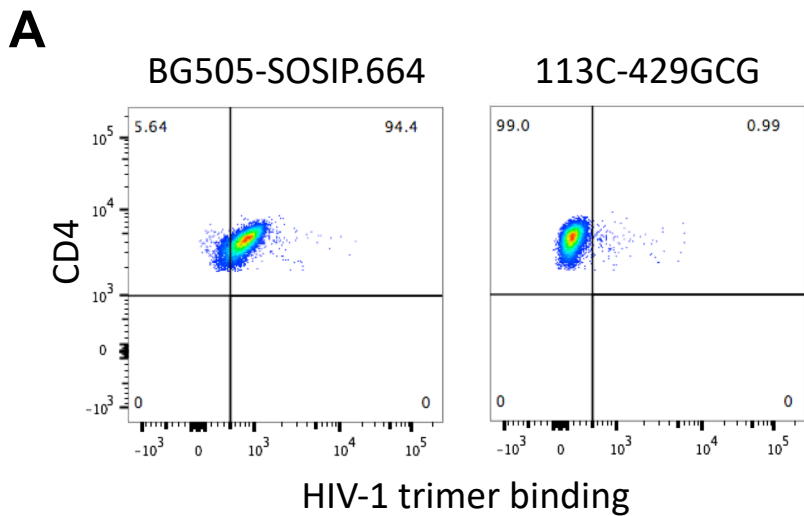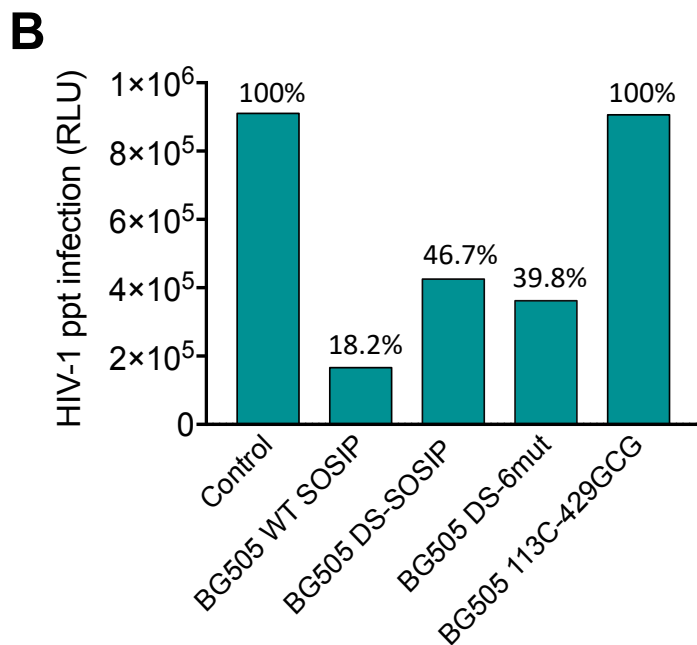

**Figure S5. Lack of biologically-relevant interaction of stabilized trimers with the CD4 receptor, Related to Figure 2**

(A) Binding of unmutated and interdomain-stabilized BG505 SOSIP.664 trimers to primary human CD4<sup>+</sup> T cells as assessed by flow cytometry. (B) Inhibition of HIV-1 BG505 pseudovirus infectivity by soluble unmutated and interdomain-stabilized BG505 SOSIP.664 trimers in human CD4<sup>+</sup> cells (TZM-bl). Two soluble trimers with reduced CD4-binding activity, i.e., DS-SOSIP (I201C-A433C) and DS-SOSIP.6mut (I201C-A433C + L154M, Y177W, N300M, N302M, T320L, I420M), were tested in parallel as controls.

Figure S6

A

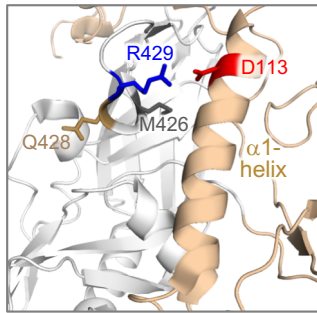

Clade-A BG505 trimer  
PDB: 5CEZ

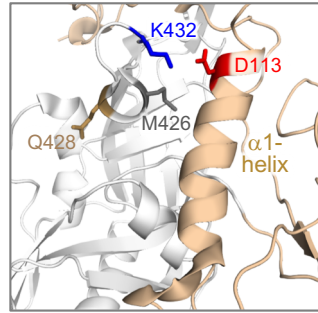

Clade-B JR-FL trimer  
PDB: 5FUU

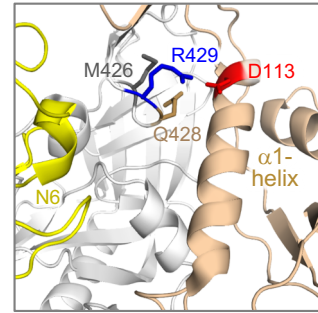

Clade-G X2088 gp120  
PDB: 5TE4

B

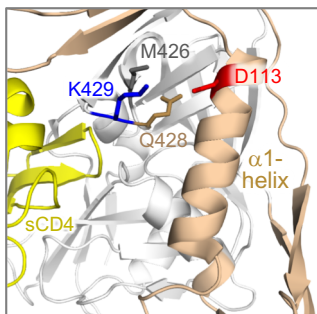

CD4-bound clade-B HXBc gp120  
PDB: 1GC1

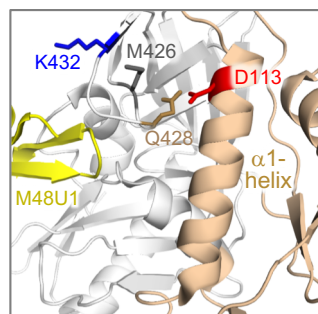

M48U1-bound clade-B YU2 gp120  
PDB: 4JZW

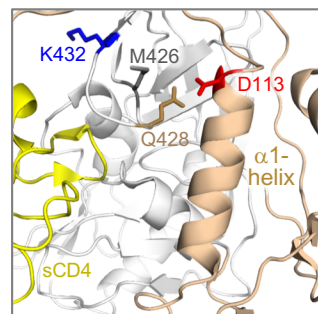

CD4-bound clade-B B41 SOSIP  
PDB: 5VN3

**Figure S6. Interaction between the  $\alpha$ 1-helix and the  $\beta$ 20-21 loop in different trimeric and monomeric HIV-1 gp120 structures, Related to Figure 3**

(A) In the pre-fusion conformation from different structures, R429/K432 in the  $\beta$ 20-21 loop points toward D113 in the  $\alpha$ 1-helix, in a favorable position for salt-bridge formation, while Q428 points in a different direction. Although the clade-G X2088 structure is based on monomeric gp120 and is not unliganded, it maintains the D113-R429 salt bridge because binding to the broadly neutralizing antibody N6 stabilizes the native gp120 conformation. (B) In the bound state from different structures (complexed with sCD4 or the CD4 miniprotein M48U1), K429/432 rotates outward, while Q428 moves close to D113 and M426 flips upwards. The outer domain of gp120 is shown in grey; inner domain in beige; gp120 ligands (N6, CD4 and M48U1) in yellow. Key residues are shown in stick representation.

Figure S7

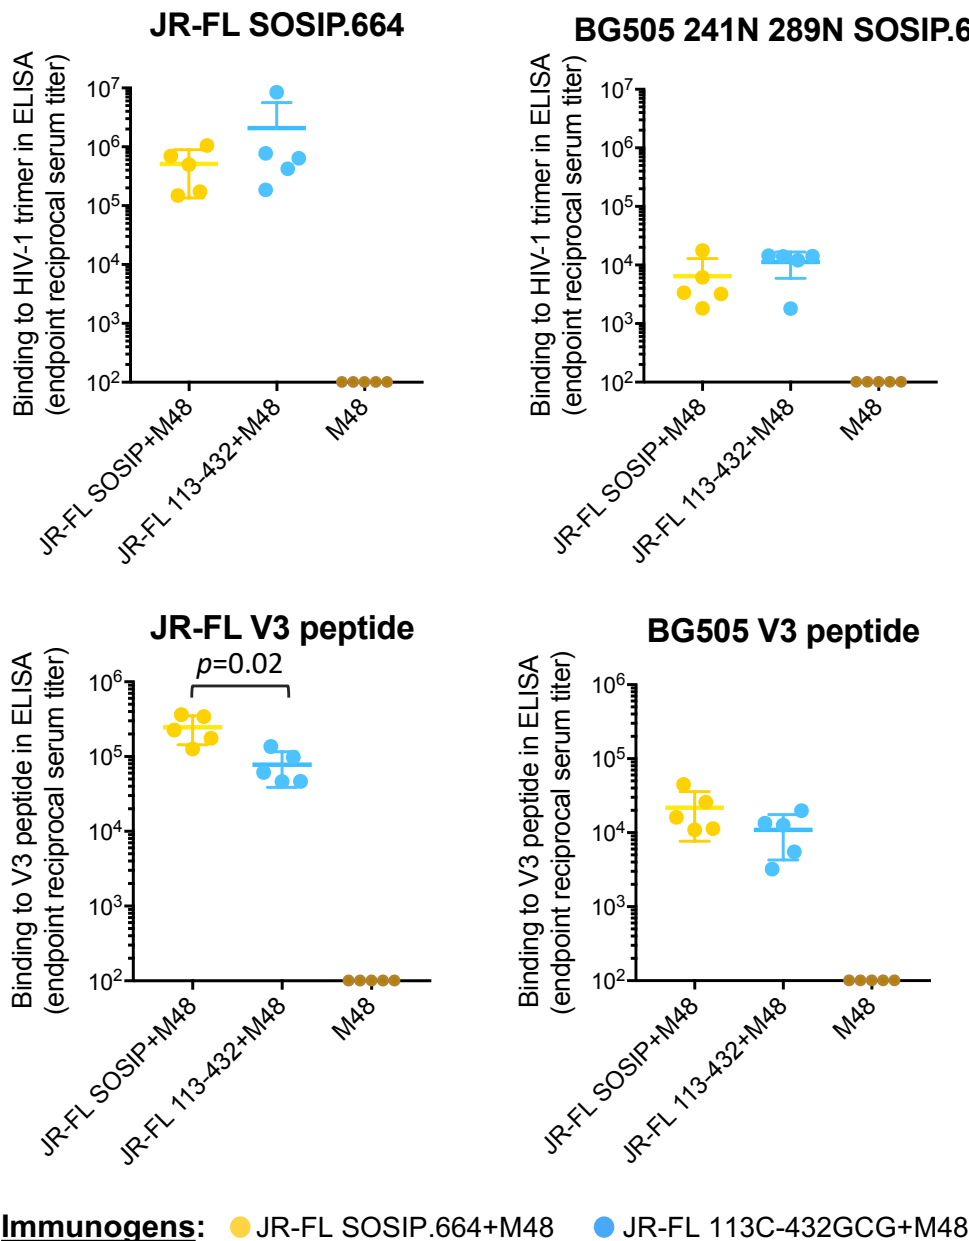

**Figure S7. Reactivity of immune rabbit sera with immobilized HIV-1 Env trimers or V3 peptides, as tested by ELISA, Related to Figure 7.**

Endpoint trimer- or peptide-binding titers are shown for week-16 sera obtained from rabbits immunized with unmutated or interdomain-locked HIV-1 JR-FL SOSIP.664 trimers in the presence of the CD4 mimic, M48U1. Serially-diluted rabbit sera were tested on JR-FL SOSIP.664 or glycan-repaired BG505 (241N 289N) trimers, as well as on both autologous (JR-FL) and heterologous (BG505) linear V3 peptides. The data show endpoint titers for individual rabbits with geometric mean and standard deviation. No statistically significant differences were found between groups as calculated by a two-tailed Mann-Whitney test using GraphPad Prism 7.

**Table S1. Reactivity of WT and mutated BG505-SOSIP.664 trimers with a panel of anti-HIV-1 Env antibodies in ELISA, Related to Figure 1.**

| 429 mutants |              | sCD4  | 2G12 | VRC01 | PG16 | PGT121 | PGT145 | 35O22 |
|-------------|--------------|-------|------|-------|------|--------|--------|-------|
| WT          | WT           | 1.04* | 1.00 | 1.00  | 0.61 | 0.85   | 0.80   | 0.11  |
| D113C       | WT           | 0.08  | 1.00 | 0.80  | 0.14 | 0.50   | 0.05   | 0.02  |
| WT          | R429C        | 0.10  | 1.00 | 0.78  | 0.22 | 0.55   | 0.21   | 0.06  |
| D113C       | R429C        | 0.11  | 1.00 | 0.23  | 0.03 | 0.27   | 0.04   | 0.02  |
| D113C       | R429GCG      | 0.03  | 1.00 | 0.97  | 0.66 | 0.75   | 0.72   | 0.11  |
| D113C       | R429GGCG     | 0.03  | 1.00 | 0.80  | 0.41 | 0.55   | 0.41   | 0.05  |
| D113C       | R429GCGG     | 0.28  | 1.00 | 0.90  | 0.44 | 0.74   | 0.48   | 0.06  |
| D113C       | R429GGCGG    | 0.09  | 1.00 | 0.99  | 0.53 | 0.68   | 0.39   | 0.04  |
| D113C       | R429GSCSG    | 0.34  | 1.00 | 0.99  | 0.37 | 0.68   | 0.29   | 0.05  |
| D113C       | R429GCGSG    | 0.49  | 1.00 | 0.92  | 0.45 | 0.74   | 0.48   | 0.06  |
| D113C       | R429GSGCGSG  | 0.79  | 1.00 | 0.94  | 0.60 | 0.79   | 0.63   | 0.07  |
| D113C       | R429GCIGG    | 0.24  | 1.00 | 0.92  | 0.31 | 0.62   | 0.23   | 0.05  |
| 432 mutants |              | sCD4  | 2G12 | VRC01 | PG16 | PGT121 | PGT145 | 35O22 |
| WT          | WT           | 1.04  | 1.00 | 1.00  | 0.61 | 0.85   | 0.80   | 0.11  |
| D113C       | G431GC       | 0.31  | 1.00 | 0.78  | 0.31 | 0.63   | 0.35   | 0.05  |
| D113C       | G431GCG      | 0.03  | 1.00 | 0.98  | 0.64 | 0.66   | 0.69   | 0.10  |
| D113C       | G431GCGG     | 0.66  | 1.00 | 0.98  | 0.18 | 0.58   | 0.11   | 0.05  |
| D113C       | G431GSGCGSG  | 0.23  | 1.00 | 0.90  | 0.44 | 0.63   | 0.38   | 0.05  |
| D113C       | Q432C        | 0.21  | 1.00 | 0.98  | 0.50 | 0.68   | 0.69   | 0.05  |
| D113C       | Q432CG       | 0.09  | 1.00 | 0.94  | 0.65 | 0.72   | 0.64   | 0.07  |
| D113C       | Q432CGG      | 0.15  | 1.00 | 0.90  | 0.52 | 0.66   | 0.43   | 0.05  |
| D113C       | Q432CI       | 0.41  | 1.00 | 0.85  | 0.06 | 0.27   | 0.11   | 0.02  |
| D113C       | Q432CGI      | 0.10  | 1.00 | 0.82  | 0.39 | 0.61   | 0.38   | 0.05  |
| D113C       | G431C Q432G  | 0.27  | 1.00 | 0.90  | 0.50 | 0.67   | 0.62   | 0.06  |
| D113C       | G431C Q432GG | 0.47  | 1.00 | 0.97  | 0.32 | 0.53   | 0.21   | 0.03  |

\*The results shown are optical density (OD) values at 450 nm, normalized relative to the value of the reference mAb 2G12 for each mutant. The unmutated BG505-SOSIP.664 trimer was expressed and tested in parallel as a control. The different shades of blue denote the intensity of binding relative to the wild-type (WT) trimer: dark blue, >90% of WT; medium dark blue, 70-90%; medium-light blue, 50-70%; light blue, 20-50%; white, <20%.



**Table S2. X-ray structure statistics, Related to [Figure 3](#).**

| <b>BG505-SOSIP 113C-429GCG</b>                      |                                                                     |
|-----------------------------------------------------|---------------------------------------------------------------------|
| PDB ID                                              | XXXX                                                                |
| <u>Data collection</u>                              |                                                                     |
| Space group                                         | P6 <sub>3</sub>                                                     |
| Cell dimensions                                     |                                                                     |
| <i>a</i> , <i>b</i> , <i>c</i> (Å)                  | 128.65 128.65 312.92                                                |
| <i>a</i> , <i>b</i> , <i>g</i> (°)                  | 90.0, 90.0, 120.0                                                   |
| Resolution (Å)                                      | 50.0-4.30 (4.40-4.30)*; 50.0-4.10 (4.40-4.30, 4.30-4.20, 4.20-4.10) |
| <i>R</i> <sub>merge</sub> (%)                       | 20.8 (48.8); 18.2 (43.9, 52.8, 72.6)                                |
| <i>I</i> / <i>σI</i>                                | 7.4 (2.0); 8.7 (2.2, 1.8, 1.1)                                      |
| Completeness (%)                                    | 81.0 (50.0); 75.6 (49.9, 45.7, 44.0)                                |
| Redundancy                                          | 7.3 (4.0); 6.6 (3.7, 3.6, 3.4)                                      |
| <u>Refinement</u>                                   |                                                                     |
| Resolution (Å)                                      | 42.11-4.12 (4.27-4.12)                                              |
| No. reflections                                     | 14133(503)                                                          |
| <i>R</i> <sub>work</sub> / <i>R</i> <sub>free</sub> | 25.8/28.4                                                           |
| No. atoms (total)                                   | 11747                                                               |
| Protein                                             | 10964                                                               |
| Carbohydrate                                        | 783                                                                 |
| <i>B</i> -factors (Å) <sup>2</sup>                  |                                                                     |
| Protein                                             | 74.4                                                                |
| Carbohydrate                                        | 79.3                                                                |
| R.m.s. deviations                                   |                                                                     |
| Bond lengths (Å)                                    | 0.006                                                               |
| Bond angles (°)                                     | 0.92                                                                |

\*Values in parentheses are for highest-resolution shell. Three crystals were used to determine the structure. Data processing statistics based on the overall resolution cutoff determined as: completeness greater than 50% and *I*/*σI* greater than 2, as mentioned in the Methods.

**Table S3. Reactivity of unmutated and interdomain-locked SOSIP.664 trimers based on Env from different HIV-1 clades with anti-Env mAbs and sCD4 in ELISA, Related to [Figure 2](#).**

| Env     | Trimer     | VRC01 | 2G12 | PG9  | PG16 | PGT145 | 35O22 | PGT122 | sCD4 |
|---------|------------|-------|------|------|------|--------|-------|--------|------|
| JR-FL   | SOSIP.664  | 1.69* | 1.52 | 0.38 | 0.41 | 1.20   | 0.63  | 1.13   | 1.56 |
|         | 113C432GCG | 1.79  | 1.59 | 0.45 | 0.48 | 1.33   | 0.75  | 1.55   | 0.07 |
| B41     | SOSIP.664  | 0.77  | 1.09 | 0.09 | 0.03 | 0.68   | 0.28  | 0.55   | 1.07 |
|         | 113C432GCG | 0.77  | 1.03 | 0.13 | 0.06 | 0.70   | 0.27  | 0.56   | 0.09 |
| DU422.1 | SOSIP.664  | 0.23  | 1.30 | 1.30 | 1.03 | 0.40   | 1.30  | 1.10   | 2.00 |
|         | 113C432GCG | 0.70  | 1.23 | 1.27 | 1.03 | 0.45   | 1.42  | 1.10   | 0.30 |

\*Mean optical density (OD) values at 450 nm for each mAb and sCD4 are shown from a representative experiment performed in duplicate wells. The color codes denote increased (blue) or decreased (red) binding to each stabilized trimer compared to the unmutated form.

**Table S4. Neutralization of BG505.T332N pseudoviruses by purified IgG from immunized rabbits, Related to Figure 6.**

Viral pseudoparticles expressing WT BG505 (clade A, tier 2, with a large Env glycan hole) or a glycan-repaired form of BG505.T332N (N241 N289) were neutralized using purified serum IgG obtained from rabbits immunized with unmutated or interdomain-stabilized HIV-1 SOSIP.664 trimers in the presence or absence of the CD4 mimic M48U1 at the indicated weeks after the first immunization.

| Immunogen             | Rabbit ID | Week 0 |           | Week 4 |           | Week 8 |           | Week 12 |           | Week 16 |           |
|-----------------------|-----------|--------|-----------|--------|-----------|--------|-----------|---------|-----------|---------|-----------|
|                       |           | BG505  |           | BG505  |           | BG505  |           | BG505   |           | BG505   |           |
|                       |           | WT     | N241/N289 | WT     | N241/N289 | WT     | N241/N289 | WT      | N241/N289 | WT      | N241/N289 |
| BG505                 | 1A        | >400*  | >400      | 41.0   | 79.7      | 3.5    | 9.5       | 3.1     | 6.5       | 1.7     | 4.7       |
|                       | 1B        | >400   | >400      | >400   | >400      | 9.0    | 90.1      | 1.4     | 24.9      | 1.5     | 20.2      |
|                       | 1C        | >400   | >400      | >400   | >400      | 41.1   | >400      | 32.1    | >400      | 10.5    | >400      |
|                       | 1D        | >400   | >400      | >400   | >400      | >400   | >400      | 203     | >400      | 288     | >400      |
| BG505 + M48U1         | 2A        | >400   | >400      | >400   | >400      | 7.2    | 6.8       | 2.7     | 6.3       | 3.4     | 5.8       |
|                       | 2B        | >400   | >400      | >400   | >400      | 23.4   | >400      | 3.7     | >400      | 2.1     | >400      |
|                       | 2C        | >400   | >400      | 249    | >400      | 4.9    | 7.5       | 0.8     | 2.9       | 1.3     | 3.6       |
|                       | 2D        | >400   | >400      | >400   | >400      | 73.0   | >400      | 16.7    | >400      | 10.5    | >400      |
|                       | 2E        | >400   | >400      | >400   | >400      | 38.8   | >400      | 6.7     | >400      | 5.0     | >400      |
| BG505 113-429         | 3A        | >400   | >400      | 122    | >400      | 24.8   | >400      | 3.4     | >400      | 5.3     | >400      |
|                       | 3B        | >400   | >400      | 30.0   | 62.0      | 6.3    | 2.5       | 2.7     | 2.9       | 4.8     | 3.3       |
|                       | 3C        | >400   | >400      | >400   | >400      | >400   | 83.5      | 0.8     | 53.5      | 88.2    | 54.5      |
|                       | 3D        | >400   | >400      | >400   | >400      | 48.1   | 20.4      | 11.7    | 36.8      | 1.6     | 6.5       |
|                       | 3E        | >400   | >400      | >400   | >400      | 19.6   | 36.4      | 3.1     | 2.8       | 1.4     | 1.1       |
| BG505 113-429 + M48U1 | 4A        | >400   | >400      | >400   | >400      | >400   | >400      | >400    | >400      | 318     | >400      |
|                       | 4B        | >400   | >400      | >400   | >400      | 4.9    | 5.4       | 5.6     | 5.8       | 2.8     | 1.9       |
|                       | 4C        | >400   | >400      | >400   | >400      | 20.1   | 24.3      | 22.2    | 10.6      | 4.7     | 2.9       |
|                       | 4D        | >400   | >400      | >400   | >400      | 5.1    | 12.5      | 18.7    | 4.9       | 4.4     | 7.7       |
|                       | 4E        | >400   | >400      | >400   | >400      | 90.0   | 301       | 2.9     | 33.2      | 2.8     | 5.4       |
| M48U1                 | 7A        | >400   | >400      | >400   | >400      | >400   | >400      | >400    | >400      | >400    | >400      |
|                       | 7B        | >400   | >400      | >400   | >400      | >400   | >400      | >400    | >400      | >400    | >400      |
|                       | 7C        | >400   | >400      | >400   | >400      | >400   | >400      | >400    | >400      | >400    | >400      |
|                       | 7D        | >400   | >400      | >400   | >400      | >400   | >400      | >400    | >400      | >400    | >400      |
|                       | 7E        | >400   | >400      | >400   | >400      | >400   | >400      | >400    | >400      | >400    | >400      |

IC50 (IgG, mg/ml):

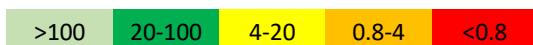

\*Half-maximal inhibitory IgG concentrations (IC<sub>50</sub>, µg/ml) are shown from a representative neutralization experiment performed in duplicate wells in TZMbl cells. For the immunization schedule, see Figure 6A.

**Table S5. Neutralization of JR-FL pseudoviruses by purified IgG from immunized rabbits, Related to Figure 7.**

Viral pseudoparticles expressing WT JR-FL pseudovirus (clade B, tier 2) or a glycan-repaired form of JR-FL (N197) were neutralized using purified serum IgG obtained from rabbits immunized with unmutated or interdomain-stabilized HIV-1 SOSIP.664 trimers in the presence or absence of the CD4 mimic M48U1 at the indicated weeks after the first immunization.

| Immunogen             | Rabbit ID | Week 0 |      | Week 4 |      | Week 8 |      | Week 12 |      | Week 16 |      |
|-----------------------|-----------|--------|------|--------|------|--------|------|---------|------|---------|------|
|                       |           | JR-FL  |      | JR-FL  |      | JR-FL  |      | JR-FL   |      | JR-FL   |      |
|                       |           | WT *   | N197 | WT     | N197 | WT     | N197 | WT      | N197 | WT      | N197 |
| JR-FL + M48U1         | 5A        | >400   | nt   | >400   | nt   | >400   | >400 | 179     | 320  | 129     | 276  |
|                       | 5B        | >400   | nt   | >400   | nt   | >400   | >400 | >400    | >400 | >400    | >400 |
|                       | 5C        | >400   | nt   | >400   | nt   | 285    | >400 | 187     | 178  | 68.2    | 284  |
|                       | 5D        | >400   | nt   | >400   | nt   | 188    | 24.9 | 166     | 75.2 | 143     | 81.4 |
|                       | 5E        | >400   | nt   | >400   | nt   | >400   | >400 | >400    | >400 | 220     | >400 |
| JR-FL 113-432 + M48U1 | 6A        | >400   | nt   | >400   | nt   | 26.5   | 121  | 23.3    | 98.8 | 48.3    | 250  |
|                       | 6B        | >400   | nt   | >400   | nt   | 63.7   | 128  | 20.0    | 26.6 | 30.1    | 14.6 |
|                       | 6C        | >400   | nt   | >400   | nt   | 28.3   | 260  | 22.1    | 94.1 | 7.1     | 11.9 |
|                       | 6D        | >400   | nt   | >400   | nt   | 266    | 29.1 | 154     | 66.3 | 54.6    | 11.6 |
|                       | 6E        | >400   | nt   | >400   | nt   | 120    | >400 | 174     | 144  | 65.3    | 97.6 |
| M48U1                 | 7A        | >400   | nt   | >400   | nt   | >400   | nt   | >400    | nt   | >400    | nt   |
|                       | 7B        | >400   | nt   | >400   | nt   | >400   | nt   | >400    | nt   | >400    | nt   |
|                       | 7C        | >400   | nt   | >400   | nt   | >400   | nt   | >400    | nt   | >400    | nt   |
|                       | 7D        | >400   | nt   | >400   | nt   | >400   | nt   | >400    | nt   | >400    | nt   |
|                       | 7E        | >400   | nt   | >400   | nt   | >400   | nt   | >400    | nt   | >400    | nt   |

IC50 (IgG, mg/ml): >100 20-100 2-20 0.2-2 0.02-0.2

\*Half-maximal inhibitory IgG concentrations (IC<sub>50</sub>, µg/ml) are shown from a representative neutralization experiment performed in duplicate wells in TZMbl cells. nt = not tested. For the immunization schedule, see Figure 6A.

**Table S6. Neutralization of heterologous pseudoviruses by purified IgG from immunized rabbit, Related to [Figures 6 and 7](#).**

Viral pseudoparticles expressing different HIV-1 Env were neutralized using purified serum IgG obtained from rabbits immunized with unmutated or interdomain-stabilized HIV-1 SOSIP.664 trimers in the presence or absence of the CD4 mimic M48U1 at week 16 after the first immunization.

| Immunogen             | Tier   | 1a    | 1b     | 2     | 2     | 2    | 2     | 2    | 2     | 2     | 2      | 2           | 2        | 2       | 2      | 2       | 2      | 2      | 2      | 2     | 2        | 2        | 2     | 2     |
|-----------------------|--------|-------|--------|-------|-------|------|-------|------|-------|-------|--------|-------------|----------|---------|--------|---------|--------|--------|--------|-------|----------|----------|-------|-------|
|                       | Clade  | B     | B      | A     | A     | A    | B     | B    | B     | B     | AC rec | CRF07_BC    | CRF07_BC | C       | C      | C       | C      | C      | C      | AE    | CRF01_AE | CRF01_AE | G     | G     |
|                       | Strain | SF162 | Bal.01 | BG505 | RW020 | Q769 | JR-FL | Q168 | TRO11 | X2278 | 246F3  | BJOX 002000 | CH119    | DU422.1 | CE1176 | WITO.33 | TV1.29 | CE1176 | CE0217 | CNE56 | CNE55    | CNE8     | X1632 | X1632 |
| BG505                 | 1A     | 43.5  | 82.6   | 1.7   | >400  | >400 | >400  | >400 | >400  | >400  | >400   | >400        | >400     | >400    | >400   | >400    | >400   | >400   | >400   | >400  | >400     | >400     | >400  | >400  |
|                       | 1B     | 104   | 187    | 1.5   | >400  | >400 | >400  | >400 | >400  | >400  | >400   | >400        | >400     | >400    | >400   | >400    | >400   | >400   | >400   | >400  | >400     | >400     | >400  | >400  |
|                       | 1C     | 26.3  | 51.6   | 10.5  | >400  | >400 | >400  | >400 | >400  | >400  | 116.1  | >400        | >400     | >400    | >400   | >400    | >400   | >400   | >400   | >400  | >400     | >400     | >400  | >400  |
|                       | 1D     | 251   | >400   | 288   | >400  | >400 | >400  | >400 | >400  | >400  | >400   | >400        | >400     | >400    | >400   | >400    | >400   | >400   | >400   | >400  | >400     | >400     | >400  | >400  |
| BG505 + M48U1         | 2A     | 330   | >400   | 3.4   | >400  | >400 | >400  | >400 | >400  | >400  | >400   | >400        | >400     | >400    | >400   | >400    | >400   | >400   | >400   | >400  | >400     | >400     | >400  | >400  |
|                       | 2B     | 201   | 393    | 2.1   | >400  | >400 | >400  | >400 | >400  | >400  | >400   | >400        | >400     | >400    | >400   | >400    | >400   | >400   | >400   | >400  | >400     | >400     | >400  | >400  |
|                       | 2C     | 94.7  | 56.7   | 1.3   | >400  | >400 | >400  | >400 | >400  | >400  | >400   | >400        | >400     | >400    | >400   | >400    | >400   | >400   | >400   | >400  | >400     | >400     | >400  | >400  |
|                       | 2D     | 85.5  | 98.7   | 10.5  | >400  | >400 | >400  | >400 | >400  | >400  | >400   | >400        | >400     | >400    | >400   | >400    | >400   | >400   | >400   | >400  | >400     | >400     | >400  | >400  |
|                       | 2E     | 60.9  | 110.8  | 5     | >400  | >400 | >400  | >400 | >400  | >400  | >400   | >400        | >400     | >400    | >400   | >400    | >400   | >400   | >400   | >400  | >400     | >400     | >400  | >400  |
|                       | 2F     | >400  | >400   | 5.3   | >400  | >400 | >400  | >400 | >400  | >400  | >400   | >400        | >400     | >400    | >400   | >400    | >400   | >400   | >400   | >400  | >400     | >400     | >400  | >400  |
| BG505 113-429         | 3A     | >400  | >400   | 4.8   | >400  | >400 | >400  | >400 | >400  | >400  | >400   | >400        | >400     | >400    | >400   | >400    | >400   | >400   | >400   | >400  | >400     | >400     | >400  | >400  |
|                       | 3B     | 123   | 128    | 4.8   | >400  | >400 | >400  | >400 | >400  | >400  | >400   | >400        | >400     | >400    | >400   | >400    | >400   | >400   | >400   | >400  | >400     | >400     | >400  | >400  |
|                       | 3C     | 57.3  | 69.2   | 88.2  | >400  | >400 | >400  | >400 | >400  | >400  | >400   | >400        | >400     | >400    | >400   | >400    | >400   | >400   | >400   | >400  | >400     | >400     | >400  | >400  |
|                       | 3D     | >400  | 207    | 1.6   | >400  | >400 | >400  | >400 | >400  | >400  | >400   | >400        | >400     | >400    | >400   | >400    | >400   | >400   | >400   | >400  | >400     | >400     | >400  | >400  |
|                       | 3E     | 173   | >400   | 1.4   | >400  | >400 | >400  | >400 | >400  | >400  | >400   | >400        | >400     | >400    | >400   | >400    | >400   | >400   | >400   | >400  | >400     | >400     | >400  | >400  |
| BG505 113-429 + M48U1 | 4A     | 72.1  | 123    | 318   | >400  | >400 | >400  | >400 | >400  | >400  | >400   | >400        | >400     | >400    | >400   | >400    | >400   | >400   | >400   | >400  | >400     | >400     | >400  | >400  |
|                       | 4B     | 79.8  | 104    | 2.8   | >400  | >400 | >400  | >400 | >400  | >400  | >400   | >400        | >400     | >400    | >400   | >400    | >400   | >400   | >400   | >400  | >400     | >400     | >400  | >400  |
|                       | 4C     | 67.0  | 56.9   | 4.7   | >400  | >400 | >400  | >400 | >400  | >400  | >400   | >400        | >400     | >400    | >400   | >400    | >400   | >400   | >400   | >400  | >400     | >400     | >400  | >400  |
|                       | 4D     | >400  | 375.2  | 4.4   | >400  | >400 | >400  | >400 | >400  | >400  | >400   | >400        | >400     | >400    | >400   | >400    | >400   | >400   | >400   | >400  | >400     | >400     | >400  | >400  |
|                       | 4E     | 39.5  | 88.9   | 2.8   | >400  | >400 | >400  | >400 | >400  | >400  | >400   | >400        | >400     | >400    | >400   | >400    | >400   | >400   | >400   | >400  | >400     | >400     | >400  | >400  |
| JR-FL + M48U1         | 5A     | 56.7  | 127    | >400  | >400  | >400 | 129   | >400 | >400  | >400  | >400   | >400        | >400     | >400    | >400   | >400    | >400   | >400   | >400   | >400  | >400     | >400     | >400  | >400  |
|                       | 5B     | 171   | 112    | >400  | >400  | >400 | >400  | >400 | >400  | >400  | >400   | >400        | >400     | >400    | >400   | >400    | >400   | >400   | >400   | >400  | >400     | >400     | >400  | >400  |
|                       | 5C     | 23.9  | 21.7   | >400  | >400  | >400 | 68.2  | >400 | >400  | >400  | >400   | >400        | >400     | >400    | >400   | >400    | >400   | >400   | >400   | >400  | >400     | >400     | >400  | >400  |
|                       | 5D     | 159   | 135    | >400  | >400  | >400 | 143   | >400 | >400  | >400  | >400   | >400        | >400     | >400    | >400   | >400    | >400   | >400   | >400   | >400  | >400     | >400     | >400  | >400  |
|                       | 5E     | 56.4  | 161    | >400  | >400  | >400 | 220   | >400 | >400  | >400  | >400   | >400        | >400     | >400    | >400   | >400    | >400   | >400   | >400   | >400  | >400     | >400     | >400  | >400  |
| JR-FL 113-432 + M48U1 | 6A     | 174   | >400   | >400  | >400  | >400 | 48.3  | >400 | >400  | >400  | >400   | >400        | >400     | >400    | >400   | >400    | >400   | >400   | >400   | >400  | >400     | >400     | >400  | >400  |
|                       | 6B     | 105   | 250    | 237   | >400  | >400 | 30.1  | >400 | >400  | >400  | >400   | >400        | >400     | >400    | >400   | >400    | >400   | >400   | >400   | >400  | >400     | >400     | >400  | >400  |
|                       | 6C     | 36.0  | 106    | >400  | >400  | >400 | 7.1   | >400 | >400  | >400  | >400   | >400        | >400     | >400    | >400   | >400    | >400   | >400   | >400   | >400  | >400     | >400     | >400  | >400  |
|                       | 6D     | >400  | >400   | >400  | >400  | >400 | 54.6  | >400 | >400  | >400  | >400   | >400        | >400     | >400    | >400   | >400    | >400   | >400   | >400   | >400  | >400     | >400     | >400  | >400  |
|                       | 6E     | >400  | >400   | >400  | >400  | >400 | 65.3  | >400 | >400  | >400  | >400   | >400        | >400     | >400    | >400   | >400    | >400   | >400   | >400   | >400  | >400     | >400     | >400  | >400  |
| M48U1                 | 7A     | >400  | >400   | >400  | >400  | >400 | >400  | >400 | >400  | >400  | >400   | >400        | >400     | >400    | >400   | >400    | >400   | >400   | >400   | >400  | >400     | >400     | >400  | >400  |
|                       | 7B     | >400  | >400   | >400  | >400  | >400 | >400  | >400 | >400  | >400  | >400   | >400        | >400     | >400    | >400   | >400    | >400   | >400   | >400   | >400  | >400     | >400     | >400  | >400  |
|                       | 7C     | >400  | >400   | >400  | >400  | >400 | >400  | >400 | >400  | >400  | >400   | >400        | >400     | >400    | >400   | >400    | >400   | >400   | >400   | >400  | >400     | >400     | >400  | >400  |
|                       | 7D     | >400  | >400   | >400  | >400  | >400 | >400  | >400 | >400  | >400  | >400   | >400        | >400     | >400    | >400   | >400    | >400   | >400   | >400   | >400  | >400     | >400     | >400  | >400  |
|                       | 7E     | >400  | >400   | >400  | >400  | >400 | >400  | >400 | >400  | >400  | >400   | >400        | >400     | >400    | >400   | >400    | >400   | >400   | >400   | >400  | >400     | >400     | >400  | >400  |

IC50 (IgG, µg/ml): >100 20-100 4-20 0.8-4 <0.8

\*Half-maximal inhibitory IgG concentrations (IC50, µg/ml) are shown from a representative neutralization experiment performed in duplicate wells in TZMbl cells. For the immunization schedule, see [Figure 6A](#).
